# Supplementary material
Source: MDPI journal article supplement (https://www.mdpi.com/search?q=atmosphere-10-00277)
Supplement: s001 [file atmosphere-10-00277-s001.pdf]

## Supplementary Material

### A Review of Aerosol Chemical Composition and Sources in Representative Regions of China during Wintertime

Yichen Wang<sup>1,2,3</sup>, Qiyuan Wang<sup>3,4,\*</sup>, Jianhuai Ye<sup>5</sup>, Mengyuan Yan<sup>6</sup>, Quande Qin<sup>2,\*</sup>, André S. H. Prévôt<sup>7</sup> and Junji Cao<sup>3,4,\*</sup>

<sup>1</sup> School of Humanities, Economics and Law, Northwestern Polytechnical University, Xi'an 710129, China; wangych@ieecas.cn

<sup>2</sup> College of Management, Shenzhen University, Shenzhen 518060, China

<sup>3</sup> Key Lab of Aerosol Chemistry and Physics, State Key Laboratory of Loess and Quaternary Geology, Institute of Earth Environment, Chinese Academy of Sciences, Xi'an 710061, China

<sup>4</sup> CAS Center for Excellence in Quaternary Science and Global Change, Xi'an 710061, China

<sup>5</sup> School of Engineering and Applied Sciences, Harvard University, Cambridge, MA 02138, USA; jye@seas.harvard.edu

<sup>6</sup> School of Human Settlements and Civil Engineering, Xi'an Jiaotong University, Xi'an 710049, China; yanmengyuan@stu.xjtu.edu.cn

<sup>7</sup> Laboratory of Atmospheric Chemistry, Paul Scherrer Institute (PSI), 5232 Villigen, Switzerland; andre.prevot@psi.ch

\* Correspondences: wangqy@ieecas.cn (Q.W.); qinquande@gmail.com (Q.Q.); cao@loess.llqg.ac.cn (J.C.); Tel.: +86-29-6233-6273 (Q.W.); +86-755-2653-6121 (Q.Q.); +86-029-62336-234 (J.C.)

**Table S1.** Summary of publications selected in this study.

| Region | Site              | Measurement time  | Method          | NR_PM ( $\mu\text{g m}^{-3}$ ) | Type              | Reference             |
|--------|-------------------|-------------------|-----------------|--------------------------------|-------------------|-----------------------|
| BTH    | Beijing           | Nov.-Dec.2010     | AMS             | 54.0                           | PM <sub>1</sub>   | (Hu et al., 2016)     |
|        | Beijing           | Nov.2011-Jan.2012 | ACSM            | 66.8                           | PM <sub>1</sub>   | (Sun et al., 2013)    |
|        | Beijing           | Nov.2012-Dec.2012 | ACSM            | 78.7                           | PM <sub>1</sub>   | (Wang et al., 2015)   |
|        | Beijing           | Jan.2013          | ACSM            | 77.0                           | PM <sub>1</sub>   | (Sun et al., 2014)    |
|        | Beijing           | Jan.2013          | Off-line<br>AMS | 130.6                          | PM <sub>2.5</sub> | (Huang et al., 2014)  |
|        | Beijing           | Jan.2013          | AMS             | 89.3                           | PM <sub>1</sub>   | (Zhang et al., 2014)  |
|        | Beijing           | Jan.-Mar.2013     | AMS             | 77.8                           | PM <sub>1</sub>   | (Hu et al., 2017)     |
|        | Beijing           | Dec.2013-Jan.2014 | AMS             | 56.2                           | PM <sub>1</sub>   | (Sun et al., 2015)    |
|        | Beijing           | Dec.2013-Jan.2014 | AMS             | 64                             | PM <sub>1</sub>   | (Sun et al., 2016a)   |
|        | Beijing           | Jan.2014          | AMS             | 87.7                           | PM <sub>2.5</sub> | (Elser et al., 2016)  |
|        | Beijing           | Dec.2014          | AMS             | 90.3                           | PM <sub>1</sub>   | (Zhang et al., 2016a) |
|        | Shijiazhuang      | Jan.-Feb. 2014    | ACSM            | 178.0                          | PM <sub>1</sub>   | (Huang et al., 2019)  |
| Handan | Dec.2015-Feb.2016 | ACSM              | 178.1           | PM <sub>1</sub>                | (Li et al., 2017) |                       |
| GZ     | Xi'an             | Dec.2012-Jan.2013 | ACSM            | 138.8                          | PM <sub>1</sub>   | (Wang et al., 2014)   |
|        | Xi'an             | Jan.2013          | Off-line<br>AMS | 184.3                          | PM <sub>2.5</sub> | (Huang et al., 2014)  |
|        | Xi'an             | Dec.2013-Jan.2014 | AMS             | 247.0                          | PM <sub>2.5</sub> | (Elser et al., 2016)  |
|        | Baoji             | Feb.-Mar.2014     | ACSM            | 54.0                           | PM <sub>1</sub>   | (Wang et al., 2017)   |
| PRD    | Shenzhen          | Jan.-Feb.2009     | AMS             | 57.3                           | PM <sub>1</sub>   | (Huang et al., 2010)  |
|        | Shenzhen          | Oct.-Dec.2009     | AMS             | 38.3                           | PM <sub>1</sub>   | (He et al., 2011)     |
|        | Heshan            | Nov.-Dec.2010     | AMS             | 39.7                           | PM <sub>1</sub>   | (Gong et al., 2012)   |
|        | Hongkong          | Jan.-Mar.2012     | AMS             | 15.4                           | PM <sub>1</sub>   | (Li et al., 2015)     |
|        | Guangzhou         | Jan.2013          | Off-line<br>AMS | 52.4                           | PM <sub>2.5</sub> | (Huang et al., 2014)  |
|        | Hongkong          | Nov.-Dec.2013     | ACSM            | 25.9                           | PM <sub>1</sub>   | (Sun et al., 2016b)   |
|        | Dongguan          | Dec.2013-Jan.2014 | AMS             | 52.1                           | PM <sub>1</sub>   | (Lan et al., 2017)    |
|        | Guangzhou         | Nov.2014-Jan.2015 | AMS             | 50.7                           | PM <sub>1</sub>   | (Qin et al., 2017)    |
|        | Shenzhen          | Jan.2015          | AMS             | 37.5                           | PM <sub>1</sub>   | (Cao et al., 2018)    |
|        | Shanghai          | Jan.2013          | Off-line<br>AMS | 75.7                           | PM <sub>2.5</sub> | (Huang et al., 2014)  |

---

|     |         |               |      |      |                 |                       |
|-----|---------|---------------|------|------|-----------------|-----------------------|
| YRD | Lin'an  | Nov.-Dec.2013 | AMS  | 63   | PM <sub>1</sub> | (Zhang et al., 2015a) |
|     | Nanjing | Dec.2013      | ACSM | 89.3 | PM <sub>1</sub> | (Zhang et al., 2015b) |

---

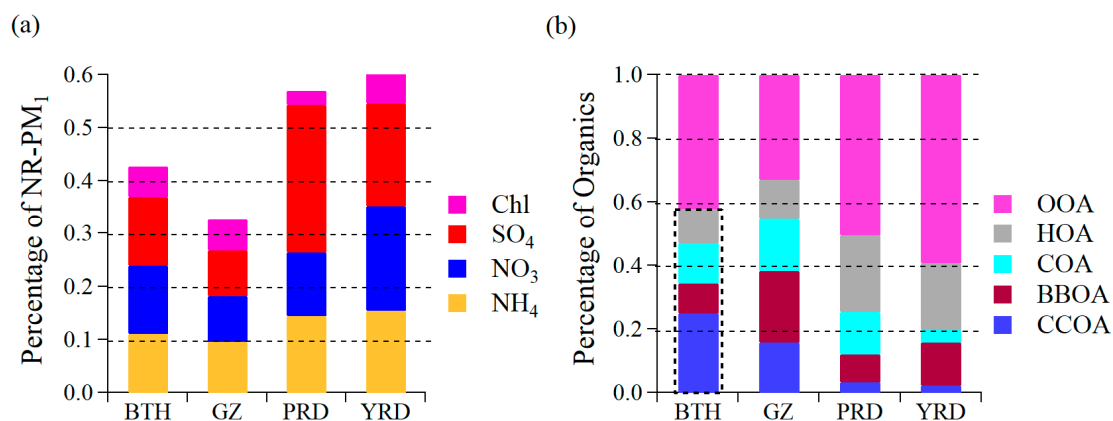

**Figure S1.** (a) Chemical compositions of inorganic aerosols and (b) fractions of organic sources in four representative regions of China during wintertime on the days of the lowest 5% PM concentrations. The dotted box refers to the primary organic aerosols.

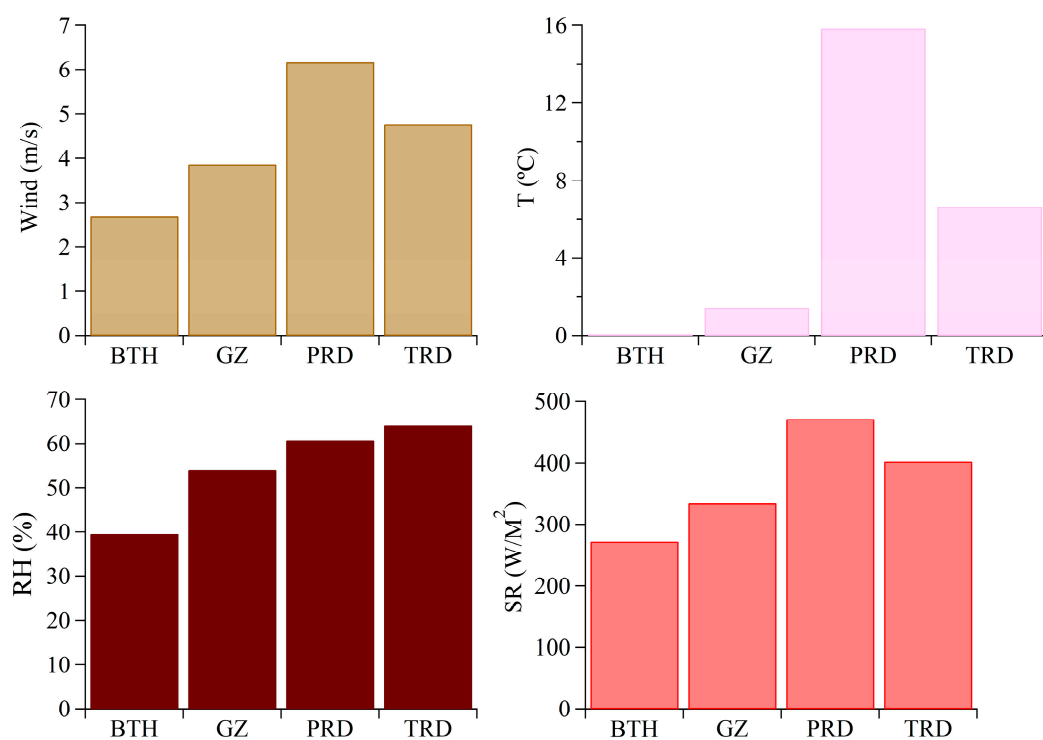

**Figure S2.** Comparison of meteorological data (wind speed, temperature, relative humidity, and solar radiation) in the four regions during the selected study period. The SR refers to the average solar radiation from 12:00 to 18:00.

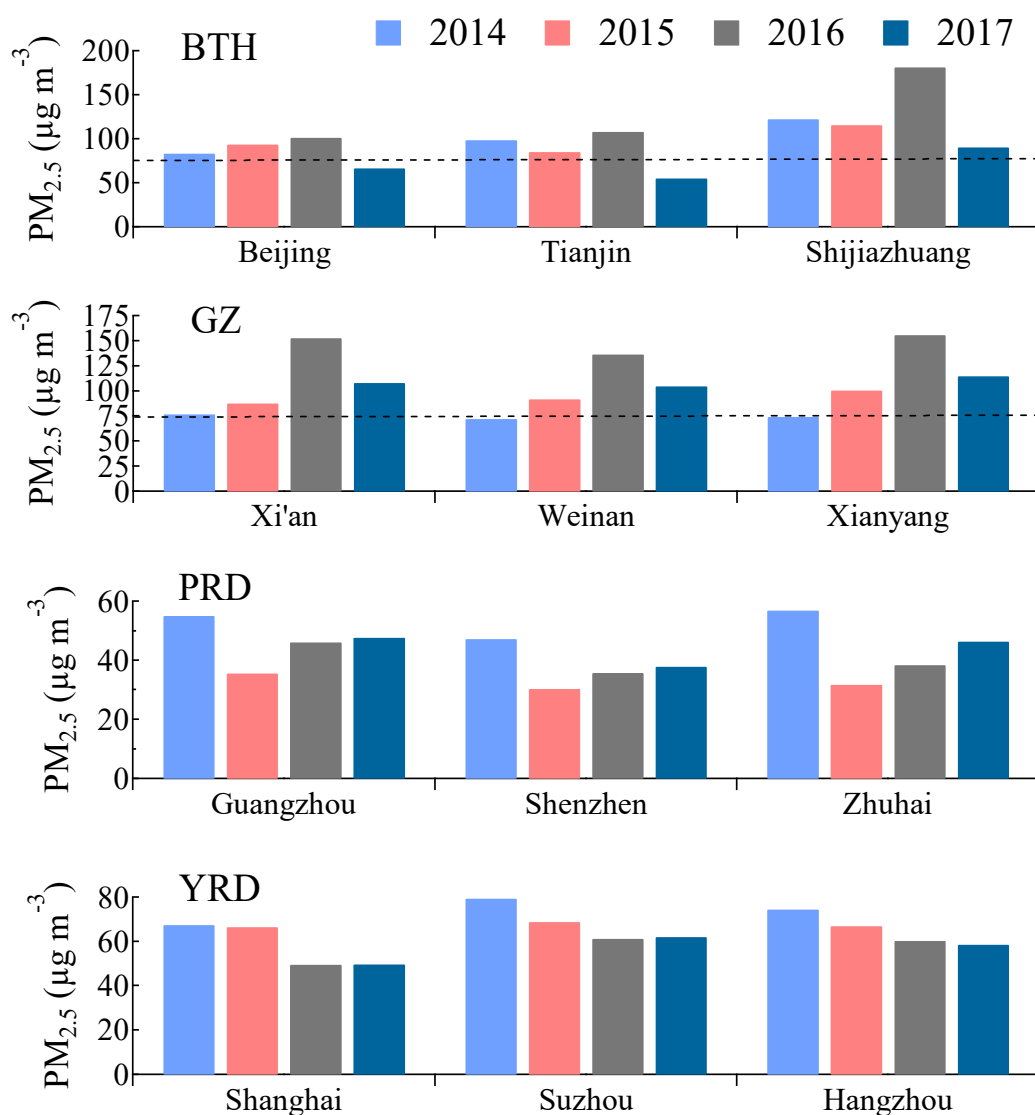

**Figure S3.** Average mass concentration of  $PM_{2.5}$  during wintertime from 2014 to 2017 in representative cities of four regions.

## References

1. Cao, L.M., Huang, X.F., Li, Y.Y., et al., 2018. Volatility measurement of atmospheric submicron aerosols in an urban atmosphere in southern China. *Atmos. Chem. Phys.* 18, 1729–1743.
2. Elser, M., Huang, R.J., Wolf, R., Slowik, J.G., et al., 2016. New insights into  $PM_{2.5}$  chemical composition and sources in two major cities in China during extreme haze events using aerosol mass spectrometry. *Atmos. Chem. Phys.* 16(5), 3207–3225.
3. Gong, Z.H., Lan, Z.J., Xue, L., Zeng, L.W., He, L.Y., et al., 2012. Characterization of submicron aerosols in the urban outflow of the central Pearl River Delta region of China. *Front. Environ. Sci. Eng.* 6, 725–733.
4. He, L.Y., Huang, X.F., Xue, L., et al., 2011. Submicron aerosol analysis and organic source apportionment in an urban atmosphere in Pearl River Delta of China using high-resolution aerosol mass spectrometry. *J. Geophys. Res. Atmos.* 116.
5. Hu, W.W., Hu, M., Hu, W., et al., 2016. Chemical composition, sources, and aging process of submicron aerosols in Beijing: Contrast between summer and winter. *J. Geophys. Res. Atmos.* 121, 1955–1977.
6. Hu, W., Hu, M., Hu, W.W., Zheng, J., Chen, C., Wu, Y.S., et al., 2017. Seasonal variations in high time-resolved chemical compositions, sources, and evolution of atmospheric submicron aerosols in the megacity Beijing. *Atmos. Chem. Phys.* 17, 9979–10000.

7. Hua, Y., Wang, S., Jiang, J., Zhou, W., Xu, Q., Li, X., Liu, B., Zhang, D., Zheng, M., 2018. Characteristics and sources of aerosol pollution at a polluted rural site southwest in Beijing, China. *Sci. Total Environ.* 626, 519–527.
8. Huang, R.-J., Wang, Y., Cao, J., Lin, C., et al., 2019. Primary emissions versus secondary formation of fine particulate matter in the top polluted city, Shijiazhuang, in North China, *Atmos. Chem. Phys.*
9. Huang, R.J., Zhang, Y.L., Bozzetti, C., et al., 2014. High secondary aerosol contribution to particulate pollution during haze events in China. *Nature.* 514, 218–222.
10. Huang X, Zhao Q, He L, Hu M, Bian Q, Xue L, Zhang Y. 2010. Identification of secondary organic aerosols based on aerosol mass spectrometry. *Sci China Chem* 53, 2593–2599.
11. Lan, Z., Zhang, B., Huang, X., Zhu, Q., et al., 2017. Source apportionment of PM<sub>2.5</sub> light extinction in an urban atmosphere in China. *J. Environ. Sci.* 63, 277–284.
12. Li, H.Y., Zhang, Q., Chen, C.R., Wang, L.T., et al., 2017. Wintertime aerosol chemistry and haze evolution in an extremely polluted city of the North China Plain: significant contribution from coal and biomass combustion. *Atmos. Chem. Phys.* 17, 4751–4768.
13. Li, Y.J., Lee, B.P., Su, L., Fung, J.C.H., Chan, C.K., 2015. Seasonal characteristics of fine particulate matter (PM) based on high-resolution time-of-flight aerosol mass spectrometric (HR-ToF-AMS) measurements at the HKUST Supersite in Hong Kong. *Atmos. Chem. Phys.* 15, 37–53.
14. Qin, Y. M., Tan, H. B., Li, Y. J., Schurman, M. I., et al., 2017. Impacts of traffic emissions on atmospheric particulate nitrate and organics at a downwind site on the periphery of Guangzhou, China. *Atmos. Chem. Phys.* 17, 10245–10258.
15. Sun, Y.L., Wang, Z.F., Fu, P.Q., et al., 2013. Aerosol composition, sources and processes during wintertime in Beijing, China. *Atmos. Chem. Phys.* 13, 4577–4592.
16. Sun, Y.L., Jiang, Q., Wang, Z.F., et al., 2014. Investigation of the sources and evolution processes of severe haze pollution in Beijing in January 2013. *J. Geophys. Res. Atmos.* 119, 4380–4398.
17. Sun, Y.L., Du, W., Wan, Q.Q., et al., 2015. Real-time characterization of aerosol particle composition above the urban canopy in Beijing: insights into the interactions between the atmospheric boundary layer and aerosol chemistry. *Environ. Sci. Technol.* 49, 11340–11347.
18. Sun, Y., Du, W., Fu, P., Wang, Q., Li, J., et al., 2016. Primary and secondary aerosols in Beijing in winter: sources, variations and processes. *Atmos. Chem. Phys.* 16, 8309–8329.
19. Sun, C., Lee, B.P., Huang, D., et al., 2016b. Continuous measurements at the urban roadside in an Asian megacity by Aerosol Chemical Speciation Monitor (ACSM): particulate matter characteristics during fall and winter seasons in Hong Kong. *Atmos. Chem. Phys.* 16, 1713–1728.
20. Wang, Q.Q., Sun, Y.L., Jiang, Q., et al., 2015. Chemical composition of aerosol particles and light extinction apportionment before and during the heating season in Beijing, China. *J. Geophys. Res. Atmos.* 120, 12708–12722.
21. Wang, Q.Y., Huang, R.J., Cao, J.J., et al., 2014. Mixing state of black carbon aerosol in a heavily polluted urban area of China: Implications for light absorption enhancement. *Aerosol Sci. Technol.* 48, 689–697.
22. Wang, Y. C., Huang, R. J., Ni, H. Y., Chen, Y., et al., 2017. Chemical composition, sources and secondary processes of aerosols in Baoji city of northwest China. *Atmos. Environ.* 58, 128–137.
23. Zhang, J.K., Sun, Y., Liu, Z.R., et al., 2014. Characterization of submicron aerosols during a month of serious pollution in Beijing, 2013. *Atmos. Chem. Phys.* 14, 2887–2903.
24. Zhang, Y., Sun, Y., Du, W., Wang, Q., et al., 2016a. Response of aerosol composition to different emission scenarios in Beijing, China. *Sci. Total Environ.* 571, 902–908.
25. Zhang, Y.J., Tang, L.L., Yu, H.X., et al., 2015a. Chemical composition, sources and evolution processes of aerosol at an urban site in Yangtze River Delta, China during wintertime. *Atmos. Environ.* 123, 339–349.
26. Zhang, Y.L., Huang, R.J., et al., 2015b. Fossil vs. non-fossil sources of fine carbonaceous aerosols in four Chinese cities during the extreme winter haze episode of 2013. *Atmos. Chem. Phys.* 15 (3), 1299–1312.
